# Supplementary material
Source: PubMed Central journal article supplement (PMC137746)
Supplement: pnas_232561099_1.pdf [file pnas_232561099_1.pdf]

### **Primers.**

The following forward (F) and reverse (R) primers were used for amplifications of *SWS2B* and *LWS* exons (E) and introns (I):

OprdF1, 5'-GCGGTATCATGAAGATTCAACCA-3' (*LWS*, E1)

OprdR1, 5'-GGAGACTTCGGAGCCATCATC-3' (*LWS*, E5)

OprdF4, 5'-TTGCTGCAAGGCGGTATCAT-3' (*LWS*, E1)

OprdR6, 5'-CCACGACAAACATCCAGAGTGT-3' (*LWS*, E2)

OprdF3, 5'-TTTGGATGGAGCGGTAACACTC-3' (*LWS*, E3)

OprdR5, 5'-CTCCTTCTGCATGGCAA-3' (*LWS*, E5)

Opb1F1, 5'-GAGGAAATCGTCCCCTGAGTTC (*SWS2B*, E1)

Opb1R1, 5'-GGCACGATTAACCTATGCAGG-3' (*SWS2B*, E5)

OprdF1, 5'-GCGGTATCATGAAGATTCAACCA-3' (*LWS*, E1)

OprdR1, 5'-GGAGACTTCGGAGCCATCATC-3' (*LWS*, E15/I1)

OprdR5, 5'-CTCCTTCTGCTGCATGGCAA-3' (*LWS*, E5)

OprdR4, 5'-CAGTCCATGAGGCCAGTACCTA-3' (*LWS*, E4)

OprdF3, 5'-TTTGGATGGAGCAGGTAAACTACTC-3' (*LWS*, E3)

OprdF5, 5'-TGTTAGAACCACAGTTAGTGCAATG-3' (*LWS*, I1)

OprdF4, 5'-TTGCTGCAAGGCGGTATCAT-3' (*LWS*, E1)

OprdR6, 5'-CCACGACAAACATCCAGAGTGT-3' (*LWS*, E2)

Opb1F1, 5'-GAGGAAATCGTCCCCTGAGTTC-3' (*SWS2B*, E1)

Opb1R1, 5'-GGCACGATTAACCTATGCAGG-3' (*SWS2B*, E5)

Opb1F3, 5'-GAAGTTGTTGGTTATGTGCTTATGTGAG-3' (*SWS2B*, I1)

Opb1R2, 5'-CCCTGGTTTGTTCCTTCTAGT-3' (*SWS2B*, I3) and

Opb1R3, 5'-AAAGCTGATGATCCATGTTTGTAC-3' (*SWS2B*, I4)
